# Supplementary material for: Cryoprotective activities of FK20, a human genome-derived intrinsically disordered peptide against cryosensitive enzymes without a stereospecific molecular interaction
Source: PeerJ journal article supplement (doi:10.7717/peerj-pchem.20), 2021-12-14
Supplement: RawData-Figure2.xlsx [file RawData-Figure2.xlsx]

## Sheet: Figure2A
				LDH 50 ug/mL
				BSA	41.8	2.7
				C1-wt	81.9	0.5
				C1-20aa	38.6	3.6
				D10-wt	72.1	4.1
				D10-20aa	84.7	9.1
				D10-15aa	59.2	15.9
				E1-wt	101.9	9.5
				E1-34aa	127.8	4.1
				E1-31aa	135.998	8.00184
				E1-28aa	93.1	0.1
				E1-25aa	130.2	3.5
				E1-20aa	32.1	3.1
				protein(-)	5.4	1.1
	BSA	C1-wt	C1-20aa	D10-wt	D10-20aa	D10-15aa	E1-wt	E1-34aa	E1-31aa	E1-28aa	E1-25aa	E1-20aa	protein(-)
1	0.443	0.825	0.414	0.724	0.772	0.415	0.916	1.233	1.287	0.932	1.289	0.342	0.0524
2	0.42	0.818	0.4	0.761	0.821	0.641	1.039	1.315	1.348	0.931	1.275	0.286	0.0446
3	0.39	0.815	0.345	0.679	0.948	0.721	1.103	1.285	1.446	0.931	1.342	0.336	0.0663
	44.3	82.5	41.4	72.4	77.2	41.5	91.6	123.3	128.7	93.2	128.9	34.2	5.24
	42	81.8	40	76.1	82.1	64.1	103.9	131.5	134.8	93.1	127.5	28.6	4.46
	39	81.5	34.5	67.9	94.8	72.1	110.3	128.5	144.6	93.1	134.2	33.6	6.63
Ave	41.7667	81.9333	38.6333	72.1333	84.7	59.2333	101.933	127.767	136.033	93.1333	130.2	32.1333	5.44333
SD	2.65769	0.51316	3.64737	4.1065	9.0835	15.8699	9.50386	4.1489	8.02143	0.057735	3.53412	3.07463	1.0992

## Sheet: Figure2B
	BSA	C1-wt	D10-wt	D10-20aa	D10-15aa	E1-wt	E1-34aa	E1-31aa	E1-28aa	E1-25aa	protein(-)
1	0.592	0.6981	0.83177	0.840807	0.567097	0.868	0.668978	0.886932	0.745131	0.821031	0.296206
2	0.57228	0.6874	0.83223	0.908321	0.546504	0.869	0.830565	0.782195	0.704817	0.447075	0.341231
3	0.57872	0.7179	0.80279	0.895117	0.548767	0.891	0.846336	0.82885	0.695757	0.778784	0.385571
	59.2	69.81	83.177	84.0807	56.7097	86.8	66.8978	88.6932	74.5131	82.1031	29.6206
	57.228	68.74	83.223	90.8321	54.6504	86.9	83.0565	78.2195	70.4817	44.7075	34.1231
	57.872	71.79	80.279	89.5117	54.8767	89.1	84.6336	82.885	69.5757	77.8784	38.5571
Ave	58.1	70.1133	82.2263	88.1415	55.4122	87.6	78.1959	83.2659	71.5235	68.2297	34.1003
SD	1.00558	1.54746	1.6866	3.57818	1.12929	1.3	9.81624	5.24723	2.62838	20.48	4.46827
BSA	58.1	1.00553
C1-wt	70.1167	1.54532
D10-wt	82.2267	1.68679
D10-20aa	88.1415	3.57818
D10-15aa	55.4122	1.12929
E1-wt	87.5715	1.28992
E1-34aa	78.1959	9.81624
E1-31aa	83.2659	5.24723
E1-28aa	71.5235	2.62838
E1-25aa	68.2297	20.48
protein(-)	34.1003	4.46827

## Sheet: Figure2C
		amino acid length	pI	Enz. Activity of LDH	SD for LDH	Enz. Activity ofGST	SD for GST
	BSA
	C1-wt	36	4.16	81.9614	0.490805	70.1167	1.54532		1.54532
	C1-20aa	20	3.66	38.63	3.63
	D10-wt	39	7.87	72.1336	4.12233	82.2267	1.68679		1.68679
	D10-20aa	20	5.31	84.68	9.08727	88.1415	3.57818		3.57818
	D10-15aa	15	5.27	59.21	15.84	55.4122	1.12929		1.12929
	E1-wt	37	6.24	101.918	9.52654	87.5715	1.28992		1.28992
	E1-34aa	34	8.34	127.778	4.14979	78.1959	9.81624		9.81624
	E1-31aa	31	6.16	135.998	8.00184	83.2659	5.24723		5.24723
	E1-28aa	28	6.16	93.1157	0.0667362	71.5235	2.62838		2.62838
	E1-25aa	25	6.16	130.195	3.50921	68.2297	20.48		20.48
	E1-20aa	20	9.53	32.1512	3.11151
	protein(-)			5.44	1.1	34.1003	4.46827
		amino acid length	pI	Normalized Enz. Activity of LDH	SD for LDH	Normalized Enz. Activity ofGST	SD for LDH
	C1-wt	36	4.16	58.6101	0.375923	66.6482	2.85959
	C1-20aa	20	3.66	25.4213	2.78033
	D10-wt	39	7.87	51.0827	3.15742	89.0575	3.12137
	D10-20aa	20	5.31	60.6924	6.96023	100.003	6.62135
	D10-15aa	15	5.27	41.1841	12.1324	39.4379	2.08973
	E1-wt	37	6.24	73.8955	7.29668	98.948	2.38697
	E1-34aa	34	8.34	93.7024	3.17845	81.5987	18.1648
	E1-31aa	31	6.16	99.9982	6.12886	90.9805	9.70989
	E1-28aa	28	6.16	67.1536	0.0511154	69.2514	4.86377
	E1-25aa	25	6.16	95.5537	2.68782	63.1563	37.8978
	E1-20aa	20	9.53	20.4589	2.3832
				0	0.842525	0.000479326	8.26846
				130.56		54.0415

## Sheet: Figure2D
		amino acid length	pI	Enz. Activity of LDH	SD for LDH	Enz. Activity ofGST	SD for GST
	BSA
	C1-wt	36	4.16	81.9614	0.490805	70.1167	1.54532		1.54532
	C1-20aa	20	3.66	38.63	3.63
	D10-wt	39	7.87	72.1336	4.12233	82.2267	1.68679		1.68679
	D10-20aa	20	5.31	84.68	9.08727	88.1415	3.57818		3.57818
	D10-15aa	15	5.27	59.21	15.84	55.4122	1.12929		1.12929
	E1-wt	37	6.24	101.918	9.52654	87.5715	1.28992		1.28992
	E1-34aa	34	8.34	127.778	4.14979	78.1959	9.81624		9.81624
	E1-31aa	31	6.16	135.998	8.00184	83.2659	5.24723		5.24723
	E1-28aa	28	6.16	93.1157	0.0667362	71.5235	2.62838		2.62838
	E1-25aa	25	6.16	130.195	3.50921	68.2297	20.48		20.48
	E1-20aa	20	9.53	32.1512	3.11151
	protein(-)			5.44	1.1	34.1003	4.46827
		amino acid length	pI	Normalized Enz. Activity of LDH	SD for LDH	Normalized Enz. Activity ofGST	SD for LDH
	C1-wt	36	4.16	58.6101	0.375923	66.6482	2.85959
	C1-20aa	20	3.66	25.4213	2.78033
	D10-wt	39	7.87	51.0827	3.15742	89.0575	3.12137
	D10-20aa	20	5.31	60.6924	6.96023	100.003	6.62135
	D10-15aa	15	5.27	41.1841	12.1324	39.4379	2.08973
	E1-wt	37	6.24	73.8955	7.29668	98.948	2.38697
	E1-34aa	34	8.34	93.7024	3.17845	81.5987	18.1648
	E1-31aa	31	6.16	99.9982	6.12886	90.9805	9.70989
	E1-28aa	28	6.16	67.1536	0.0511154	69.2514	4.86377
	E1-25aa	25	6.16	95.5537	2.68782	63.1563	37.8978
	E1-20aa	20	9.53	20.4589	2.3832
				0	0.842525	0.000479326	8.26846
				130.56		54.0415
